# Supplementary material
Source: publisher site journal article supplement (https://www.dovepress.com/article/501635)
Supplement: Supplementary file 1 [file 501635_Supplementary_Figures_1-4.pdf › 501635_Supplementary_Figures_1-4.pdf]

**Supplementary Figure S1.** Scatter plots of SNP effects on frailty versus GBMI COPD (A), and frailty versus FinnGen COPD (B), with the slope of each line corresponding to the estimated MR effect per method.

**Supplementary Figure S2.** The leave-one-out estimate of frailty on GBMI COPD (A), and frailty on FinnGen COPD (B). Data are presented as  $\beta$  with the 95% confidence interval.

**Supplementary Figure S3.** Scatter plots of SNP effects on GBMI COPD versus frailty (A), and FinnGen COPD versus frailty (B), with the slope of each line corresponding to the estimated MR effect per method.

**Supplementary Figure S4.** The leave-one-out estimate of GBMI COPD on frailty (A), and FinnGen COPD on frailty (B). Data are presented as  $\beta$  with the 95% confidence interval.

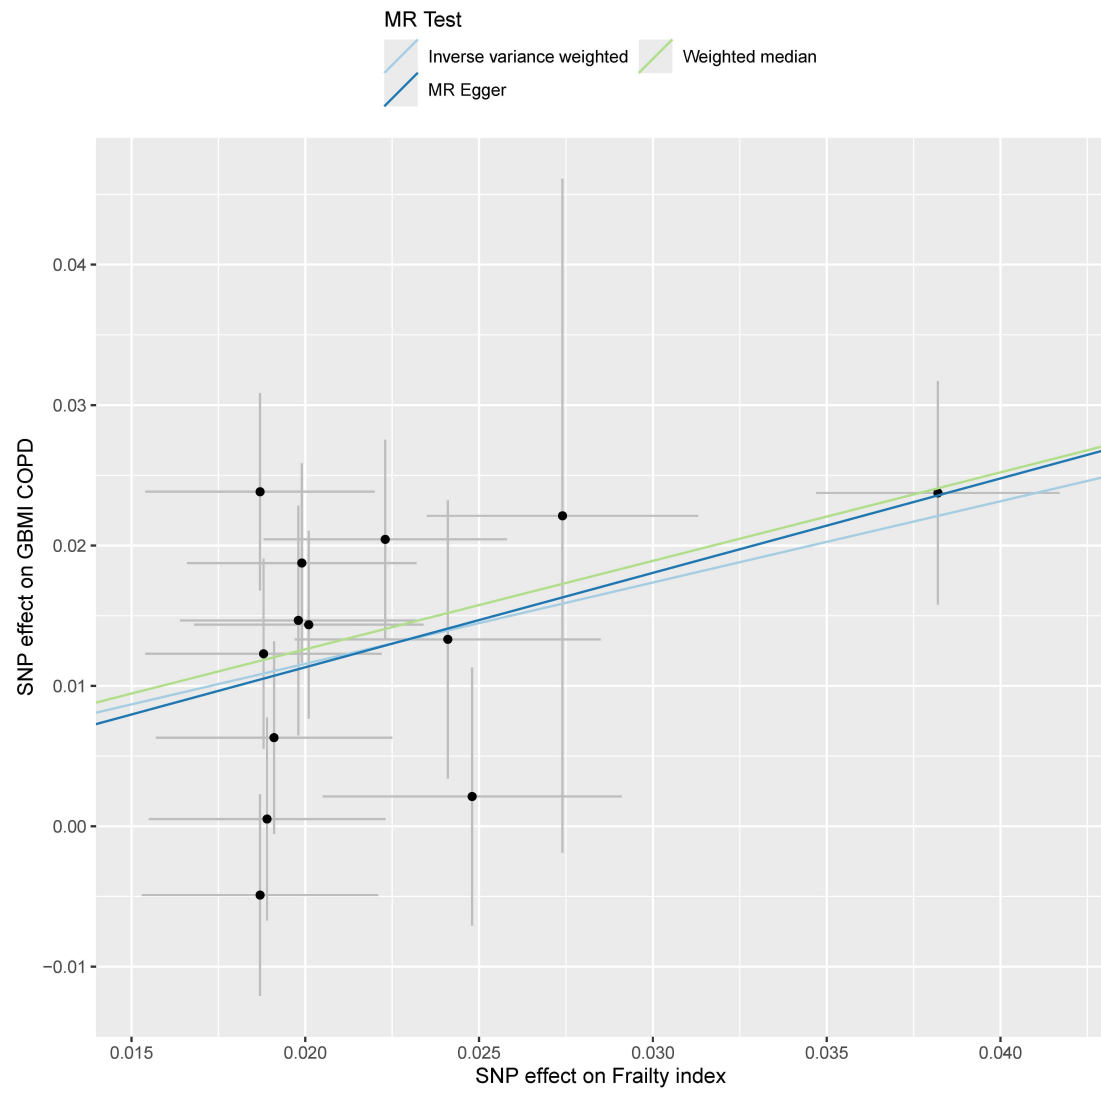

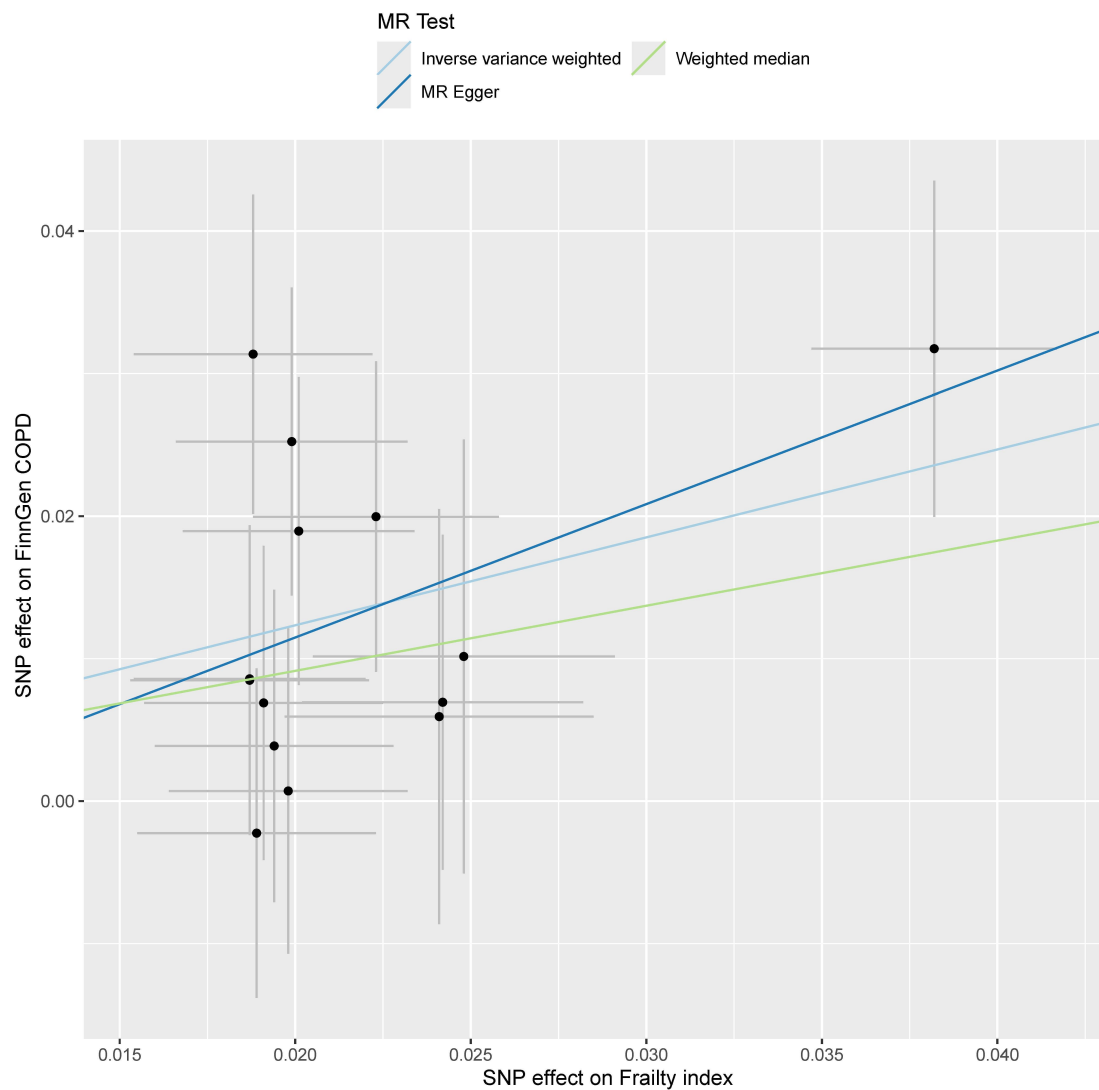

B

Supplementary Figure S1. Scatter plots of SNP effects on frailty versus GBMI COPD (A), and frailty versus FinnGen COPD (B), with the slope of each line corresponding to the estimated MR effect per method.

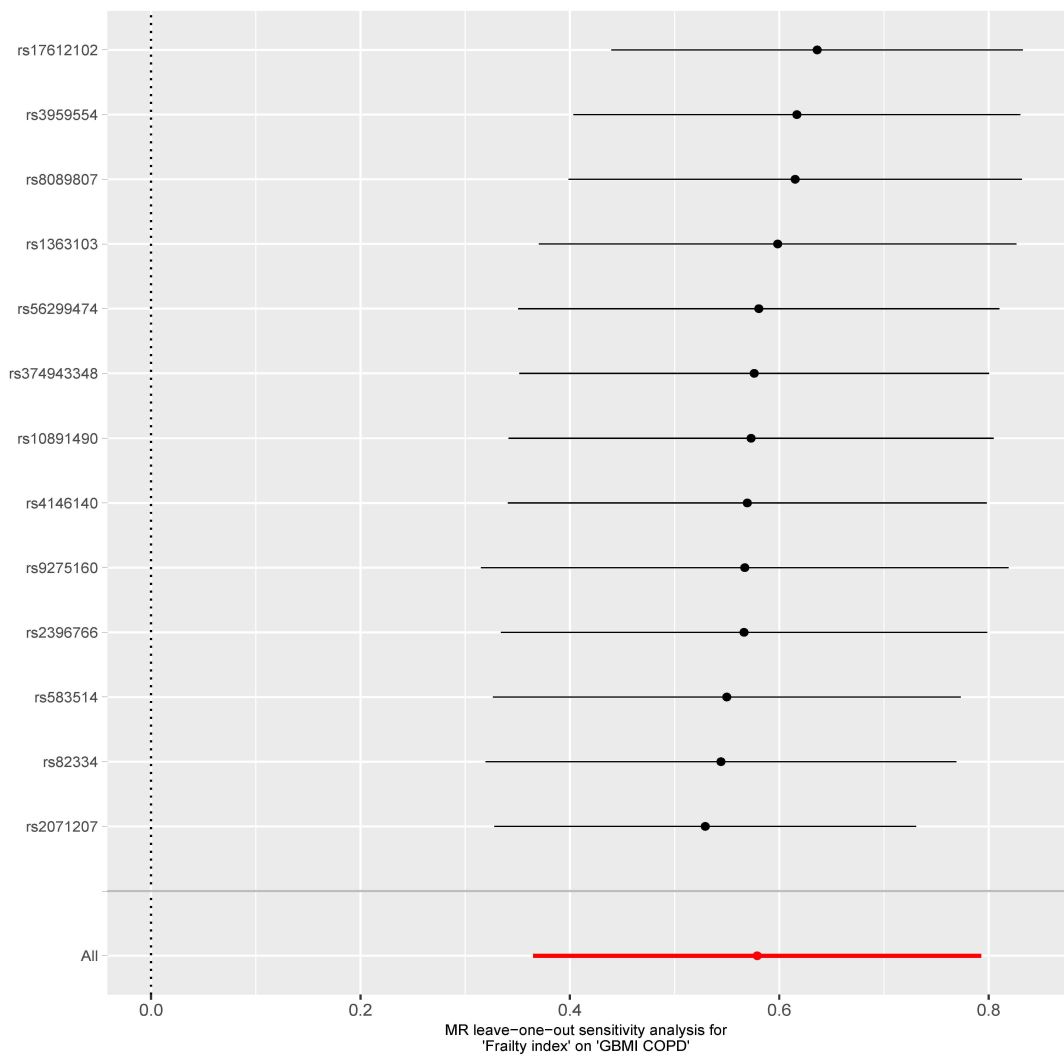

A

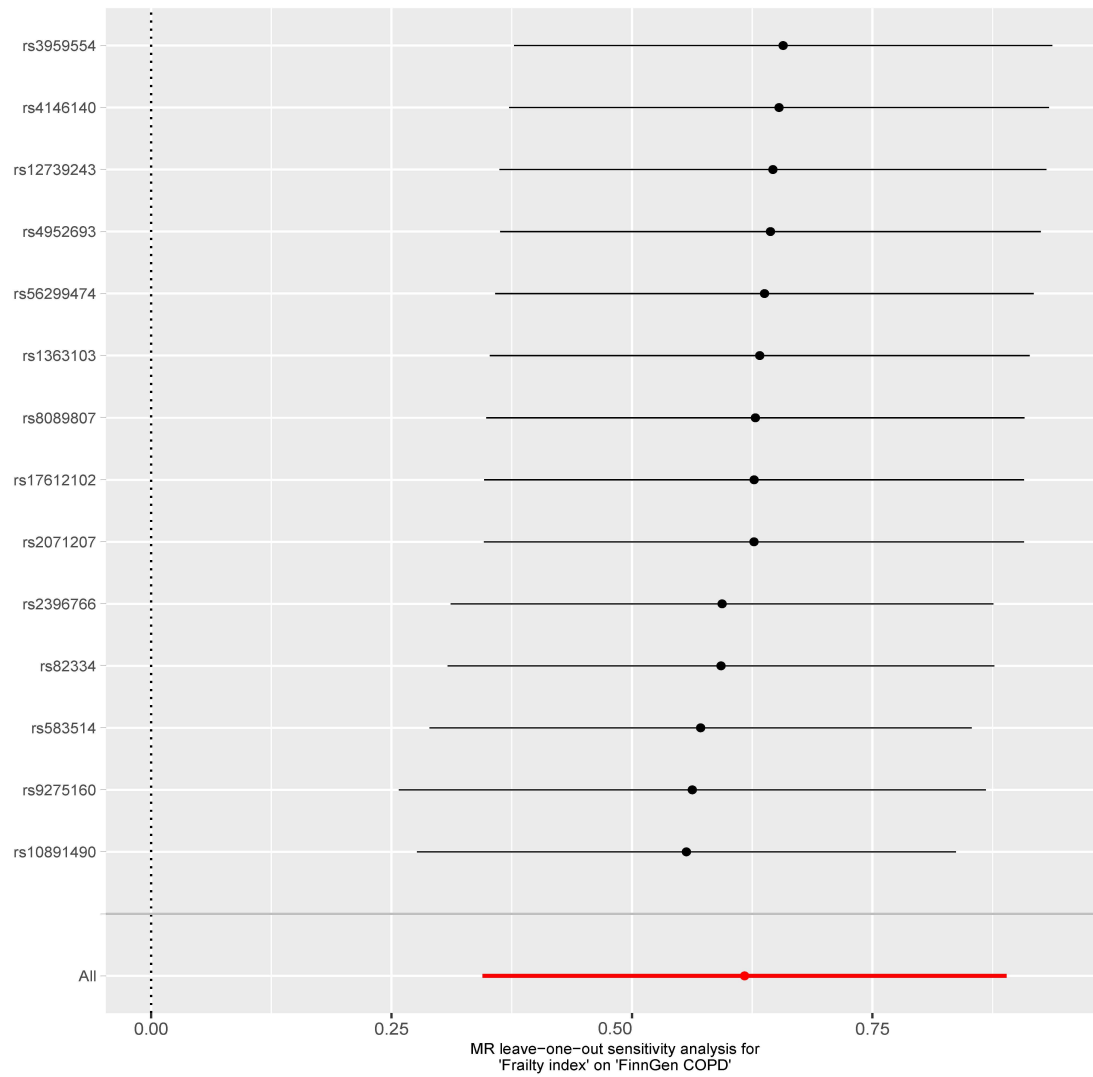

B

Supplementary Figure S2. The leave-one-out estimate of frailty on GBMI COPD (A), and frailty on FinnGen COPD (B). Data are presented as  $\beta$  with the 95% confidence interval.

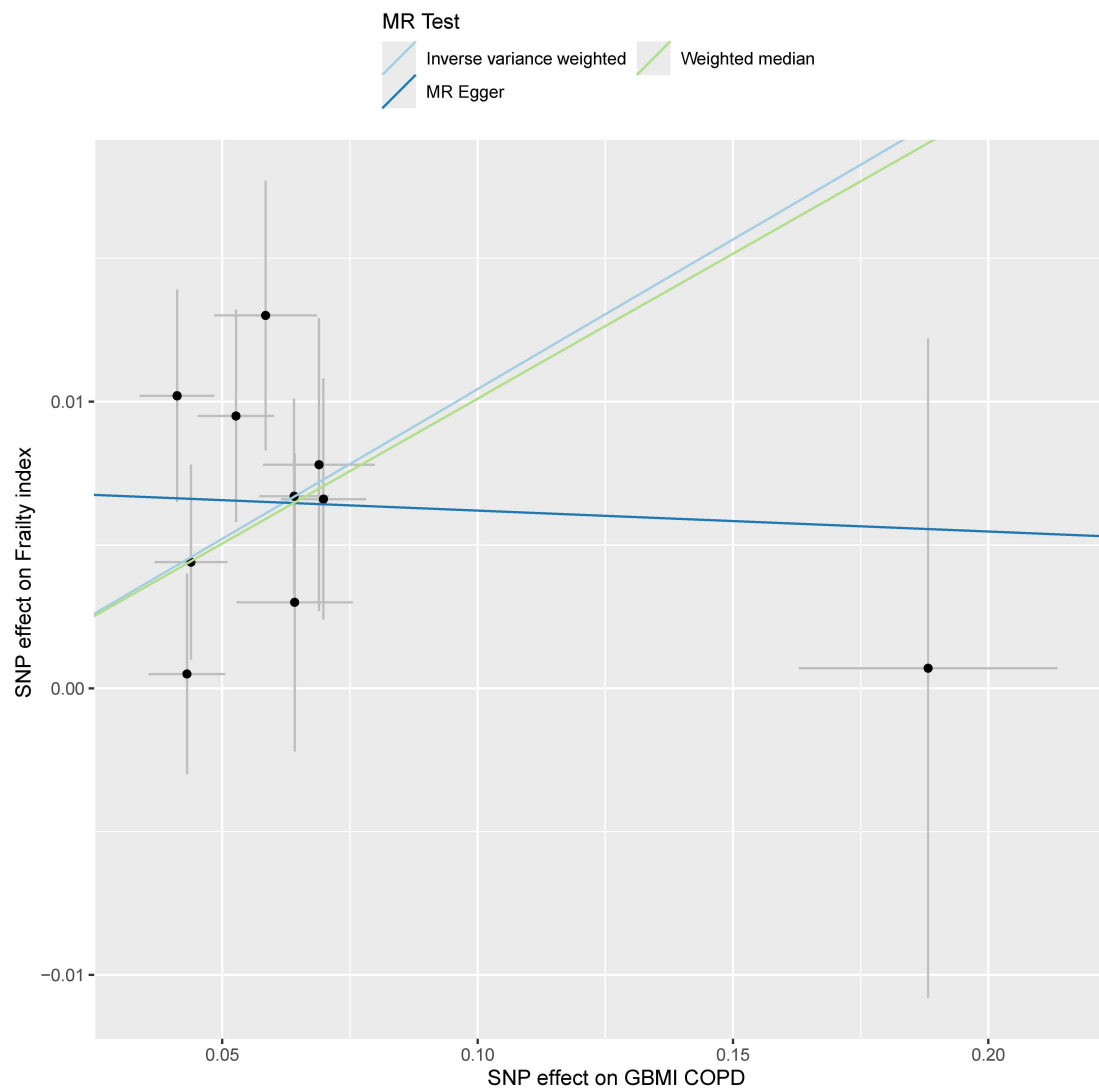

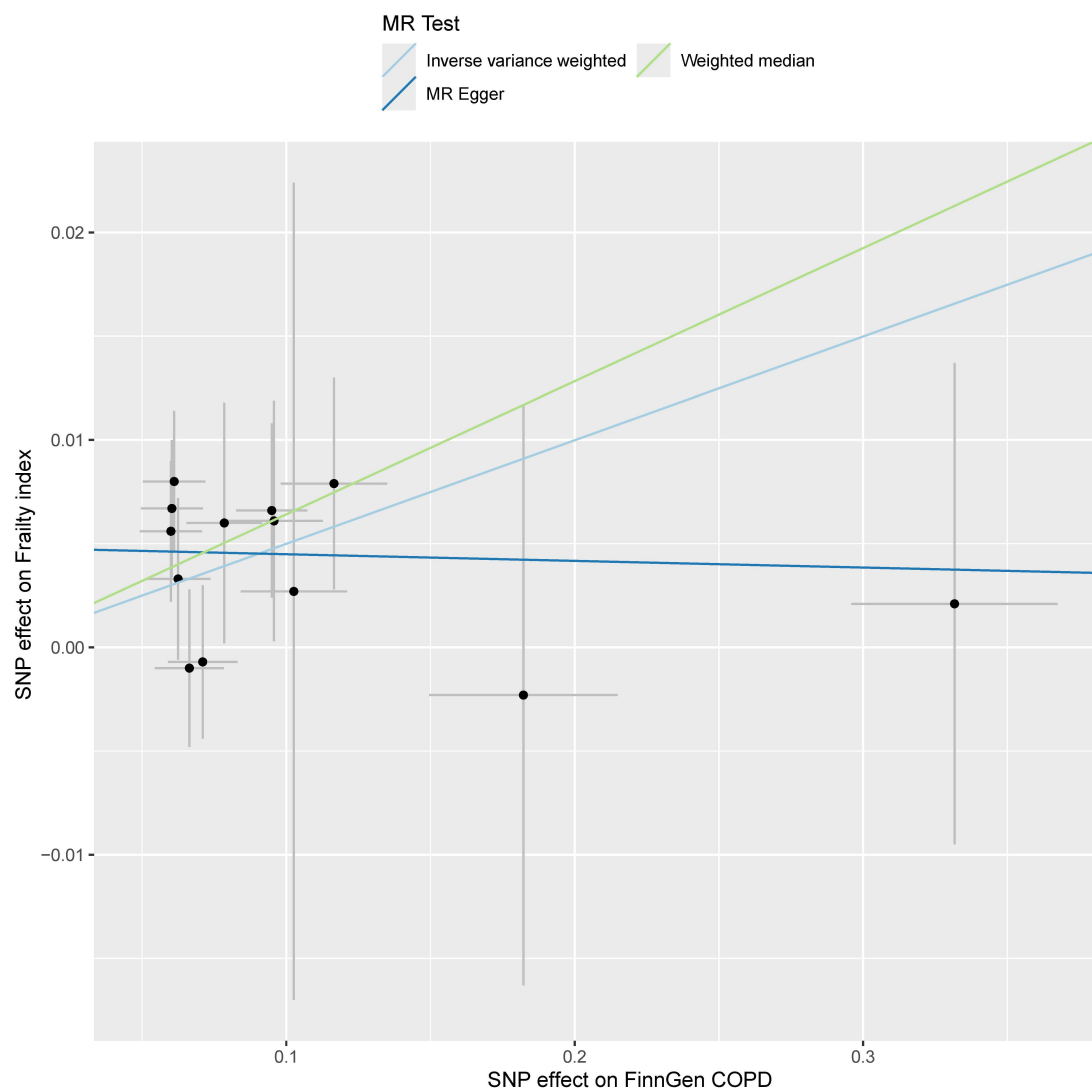

B

Supplementary Figure S3. Scatter plots of SNP effects on GBMI COPD versus frailty (A), and FinnGen COPD versus frailty (B), with the slope of each line corresponding to the estimated MR effect per method.

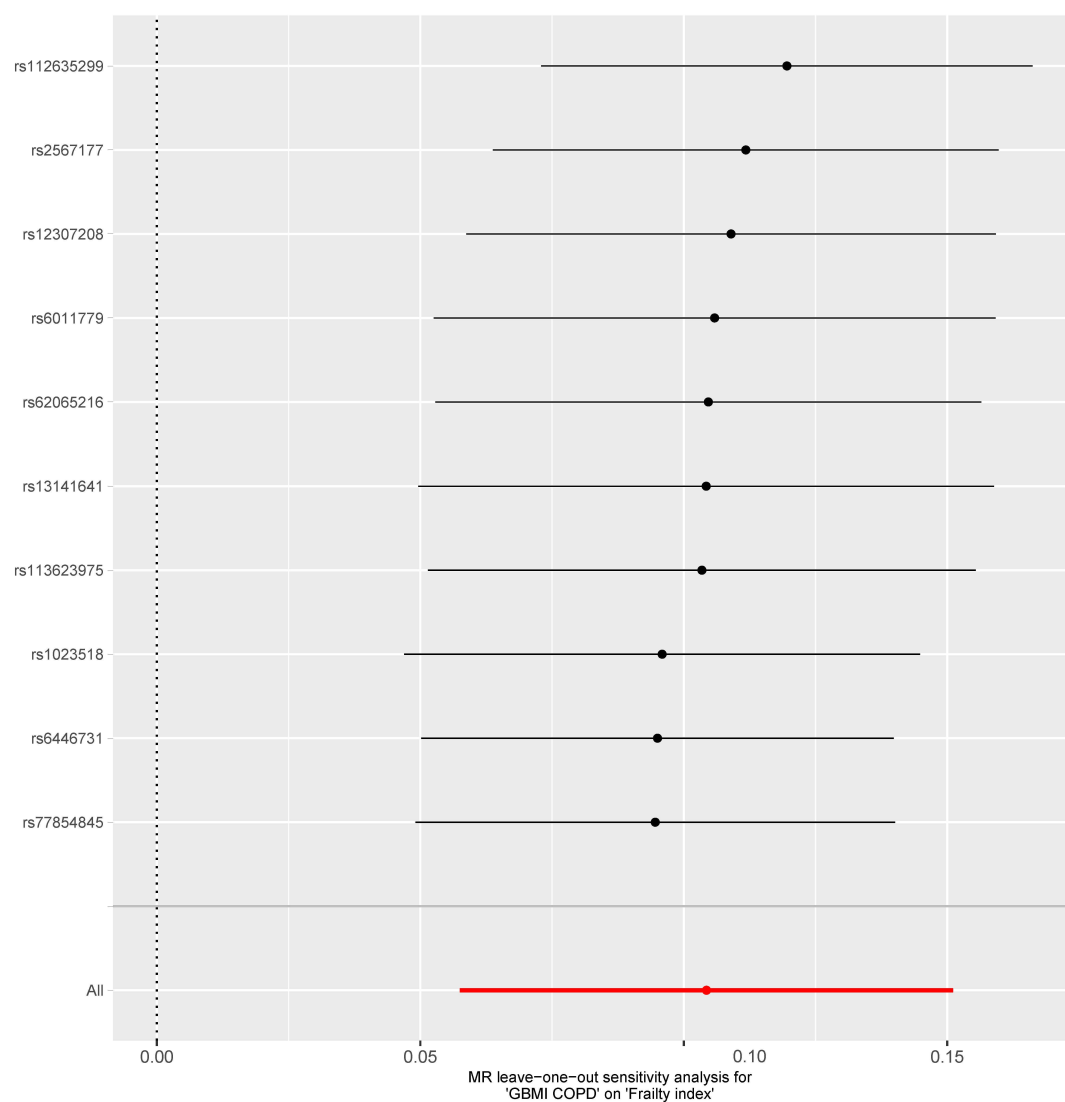

A



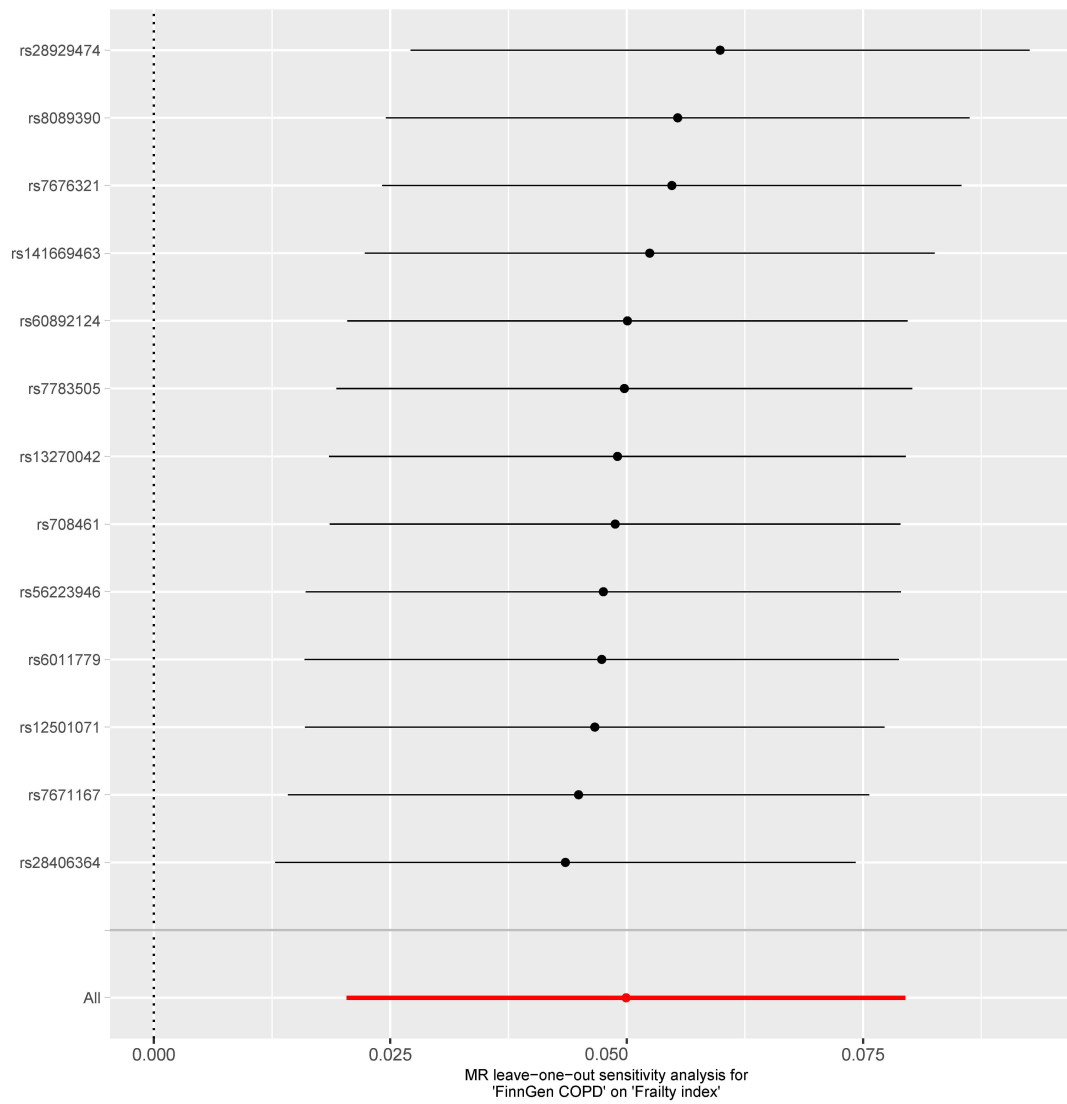

B

Supplementary Figure S4. The leave-one-out estimate of GBMI COPD on frailty (A), and FinnGen COPD on frailty (B). Data are presented as  $\beta$  with the 95% confidence interval.
